# Supplementary material for: On the nature of carrier relaxation and ion–ion interactions in ultrasmall β-NaYF4:Eu3+nanocrystals – effect of the surface
Source: Royal Society of Chemistry journal article supplement (doi:10.1039/c2nr32212a), 2012-11-13
Supplement: c2nr32212a.pdf [file c2nr32212a.pdf]

## Supporting information

# On the nature of carriers relaxation and ion-ion interactions in ultrasmall $\beta$ -NaYF<sub>4</sub>: Eu<sup>3+</sup> nanocrystals – effect of the surface

Artur Podhorodecki\*, Mateusz Banski, Agnieszka Noculak, Bartłomiej Sojka,  
Grzegorz Pawlik, Jan Misiewicz

Institute of Physics, Wrocław University of Technology, Wybrzeże Wyspińskiego  
27, 50-370 Wrocław, Poland

\*Corresponding author: e-mail: [artur.p.podhorodecki@pwr.wroc.pl](mailto:artur.p.podhorodecki@pwr.wroc.pl)

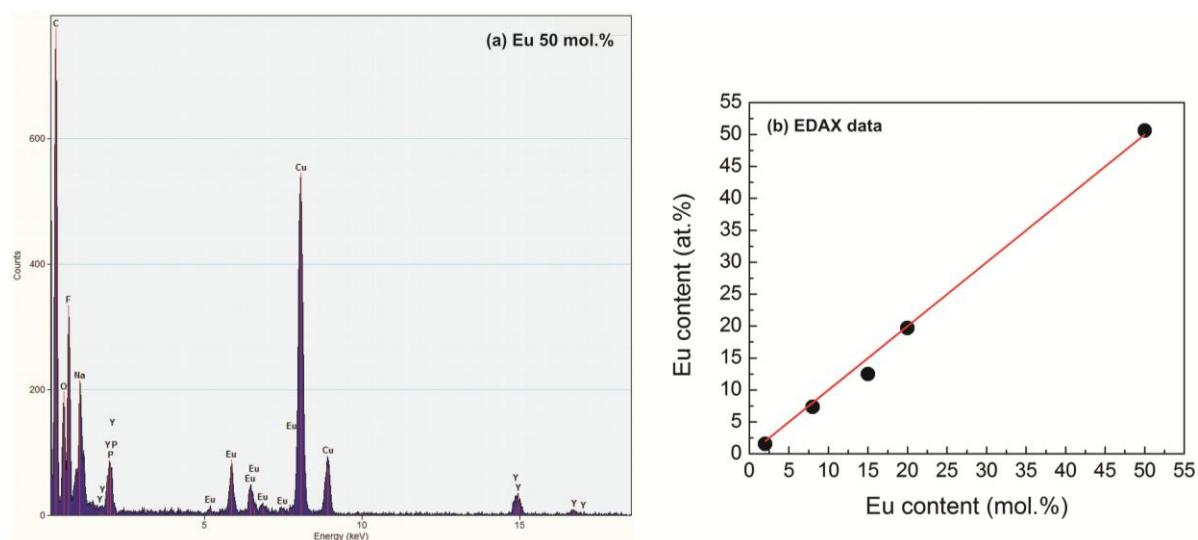

**Figure S1.** EDXS spectra for  $\beta$ -NaYF<sub>4</sub> NCs obtained with different Eu concentration.

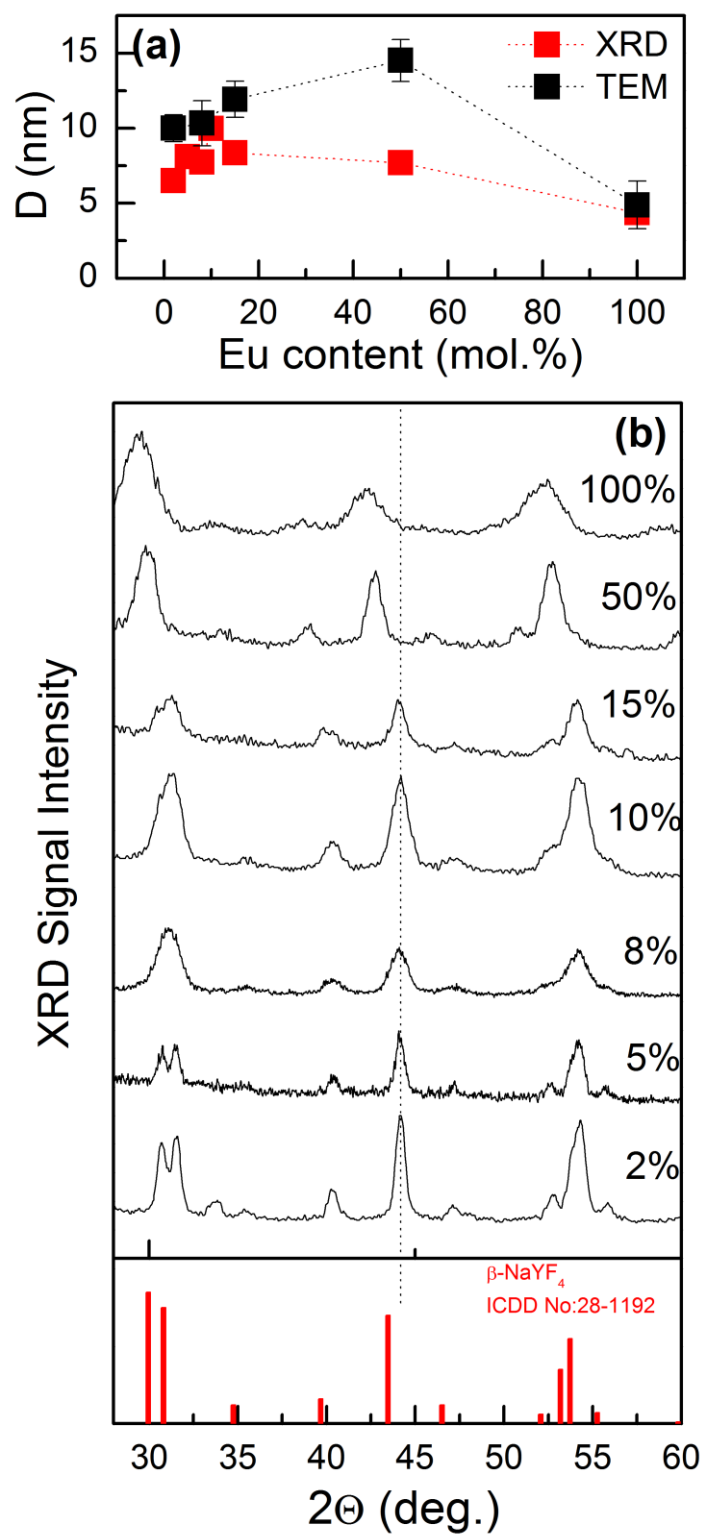

**Figure S2.** XRD spectra of Eu<sup>3+</sup> doped  $\beta$ -NaYF<sub>4</sub> NCs with (a) different Eu<sup>3+</sup> molar fraction and (b) obtained at different synthesis times.

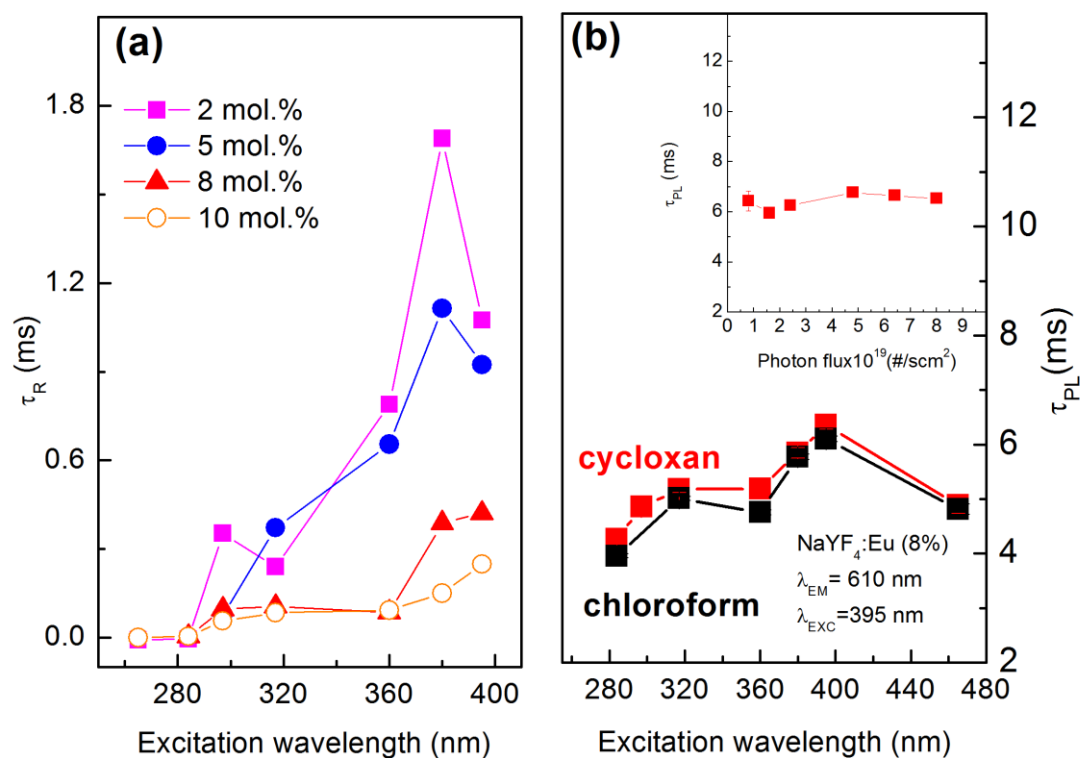

**Figure S3.** (a) Emission rise times vs. excitation wavelengths obtained for  $\beta$ -NaYF<sub>4</sub> NCs obtained with different Eu concentration. (b) Emission decay times vs. excitation wavelengths obtained for sample with 8 mol.% of Eu recorded in two different in polarity solvents. Inset: Emission decay time recorded as function of excitation flux.
